# Supplementary material
Source: publisher figshare collection journal article supplement (https://acs.figshare.com/ndownloader/files/6517668)
Supplement: Supplementary file 1 [file 6517668]

## Supporting Information(SI)

# Bipyridyltriazolium Chlorobismuthate with Thermo-/Photochromic and Photoluminescent Switching Behaviors Based on ET and CT<sup>†</sup>

*Guoping Li, Pengfei Hao, Junju Shen, Tanlai Yu, Huihui Li, and Yunlong Fu\**

School of Chemistry & Material Science, Shanxi Normal University, Linfen 041004, P. R. China

Tel. +86-357-2053716

Fax +86-357-2053716

E-mail: yunlongfu@dns.sxnu.edu.cn.

### CONTENTS

|                                                                                           |   |
|-------------------------------------------------------------------------------------------|---|
| <b>Section 1. The characterization spectra and data.</b>                                  | 2 |
| <b>Figure S1.</b> The crystallographically asymmetric unit of <b>1</b> .                  | 2 |
| <b>Figure S2.</b> Packing interaction diagram of compound <b>1</b> .                      | 2 |
| <b>Figure S3.</b> The TGA of title compound <b>1</b> .                                    | 3 |
| <b>Figure S4.</b> The Powder X-ray diffraction (PXRD).                                    | 3 |
| <b>Figure S5.</b> IR spectra.                                                             | 4 |
| <b>Figure S6.</b> UV-vis diffuse reflectance spectra and EPR spectra at 160 °C.           | 4 |
| <b>Figure S7.</b> UV-vis diffuse reflectance spectra and EPR spectra at 74 °C.            | 5 |
| <b>Figure S8.</b> The excitation spectra.                                                 | 5 |
| <b>Section 2. The detailed experiment process about photochromism and thermochromism.</b> | 5 |
| <b>Section 3. Crystallographic data tables.</b>                                           | 6 |
| <b>Table S1.</b> Selected bond lengths (Å) and angles (°) for <b>1</b> .                  | 6 |
| <b>Table S2.</b> Hydrogen-bond parameters in compound <b>1</b> .                          | 7 |

## Section 1. The characterization spectra and data.

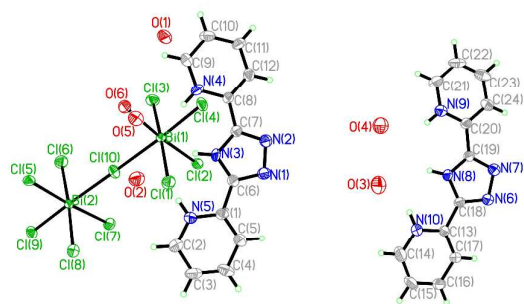

**Figure S1.** ORTEP16 drawing at 50% probability level of the crystallographically asymmetric unit of **1**.

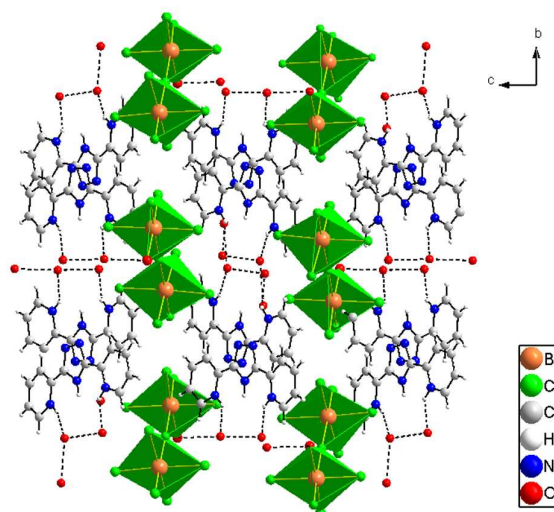

**Figure S2.** Packing interaction diagram of compound **1** along a-direction and the voids between the cations and anions are occupied by the lattice water molecules in space filling representation and O-H-O and N-H-O hydrogen bonds.

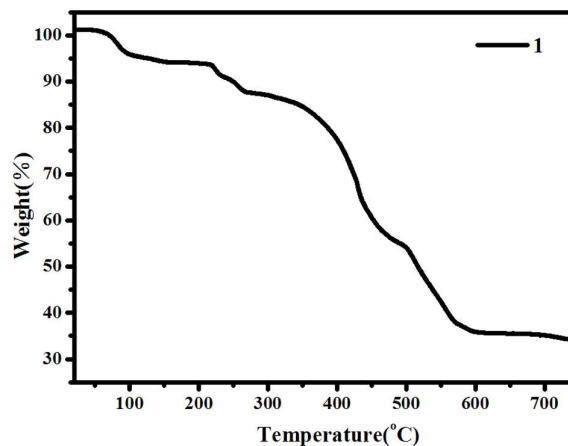

**Figure S3.** The TGA of title compound **1**.

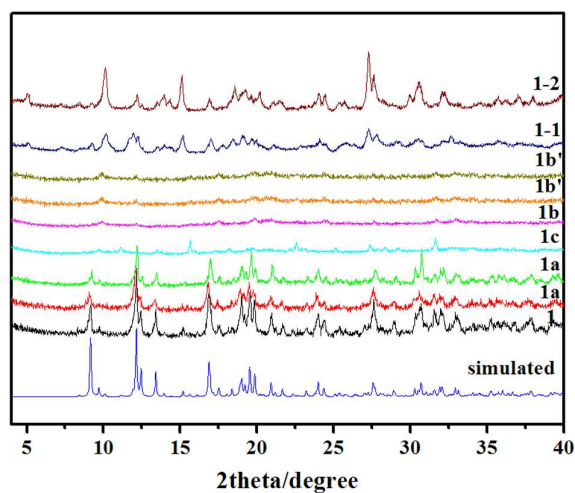

**Figure S4.** The Powder X-ray diffraction (PXRD) profiles for simulated (blue), experimental (**1**, black), after photoirradiation at room temperature for 30 minutes (**1a**, red) and after heat-treatment for 30 minutes at 54 °C (**1a**, green), 74 °C (**1c**, cyan) and in humid air for 3 days (**1-2**, wine) at room temperature; **1a** after 160 °C in air (**1b**, magenta) and **1b** after photoirradiation for 30 minutes (**1b'**, orange) and heat-treatment at 54 °C for 30 minutes in air (**1b'**, dark yellow) and **1b** in humid air for 5 days at room temperature (**1-1**, dark blue). No obvious spectral changes (**1**, black), (**1-1**, dark blue) and (**1-2**, wine) demonstrate reversible dehydration-rehydration process, the spectrum (**1a**, red) and the spectrum (**1a**, green) demonstrate structure stable after photoirradiation at ambient temperature and 54 °C heat-treatment and are the same compounds. The spectral changes (cyan) and (magenta) demonstrate that the sample takes place significantly phase transformation after dehydration after the heat-treatment at different temperatures.

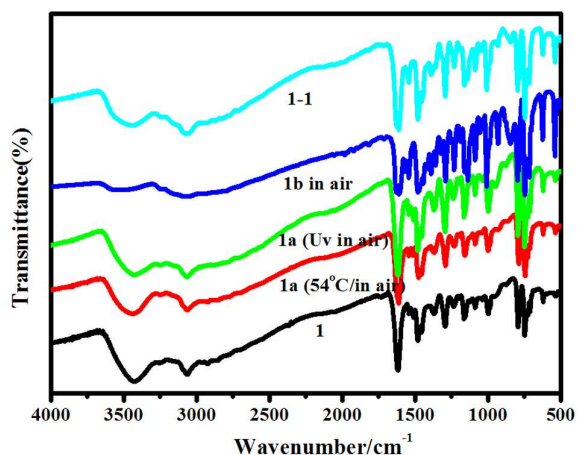

**Figure S5.** IR spectra of **1** before and after photoirradiation, heat-treatment and dehydration (**1b**, blue) in air for 1h and rehydration (**1-1**, cyan) in air for 5 days, original compound (**1**, black), after heat-treatment for 30 minutes (**1a**, red) and after photoirradiation for 30 minutes (**1a**, green).

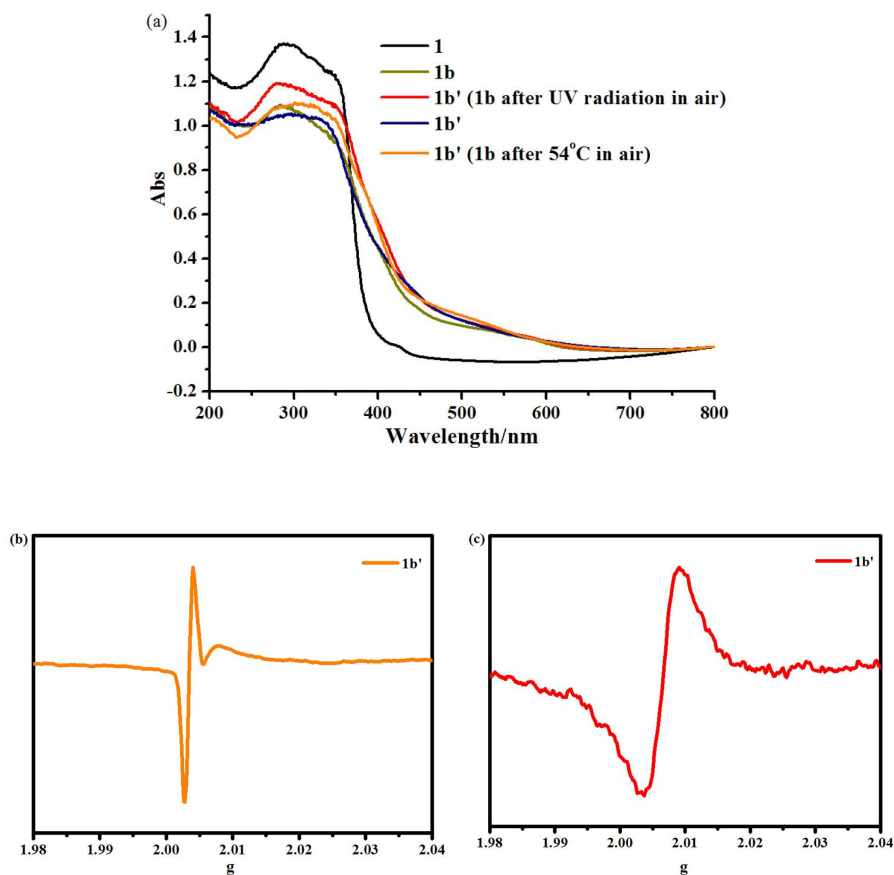

**Figure S6.** (a) **1b** after 54 °C heat-treatment 30 minutes in air (**1b'**, orange) and UV irradiation 30 minutes in air (**1b'**, red) and **1** after 160 °C heat-treatment in vacuum (**1b'**, navy) and **1** after 160 °C in air (**1b**, dark yellow); (b) The EPR spectrum of **1b'** (**1b** after 54 °C heat-treatment 30 minutes in air); (c) The EPR spectrum of **1b'** (**1b** after UV irradiation 30 minutes in air).

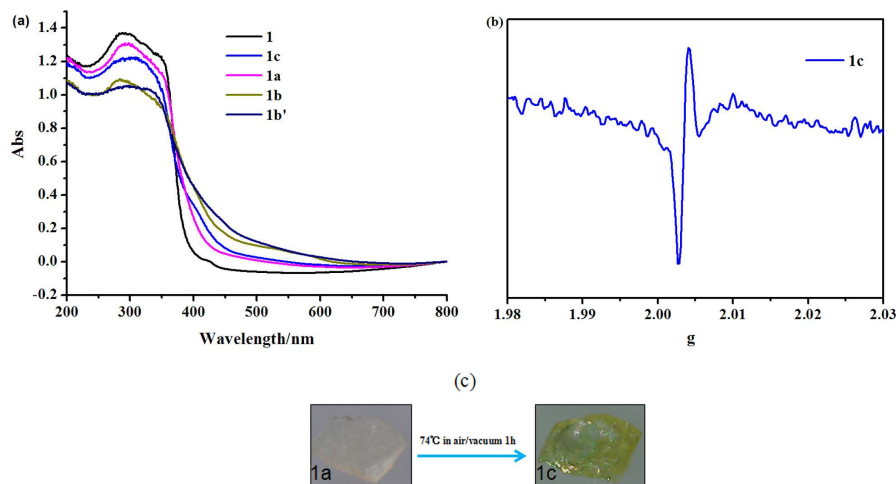

**Figure S7.** (a) **1** (black) after 54 °C in air (**1a**, magenta), 74 °C in air (**1c**, blue), 160 °C in air (**1b**, dark yellow) and 160 °C in vacuum (**1b'**, navy). (b) The EPR spectrum of **1c** (**1** after 74 °C in air). (c) Thermochromic behaviors of polyphase shown by photographic images. **1** (left) after 54 °C in air or in vacuum for 1h turns to yellow green **1c** (right).

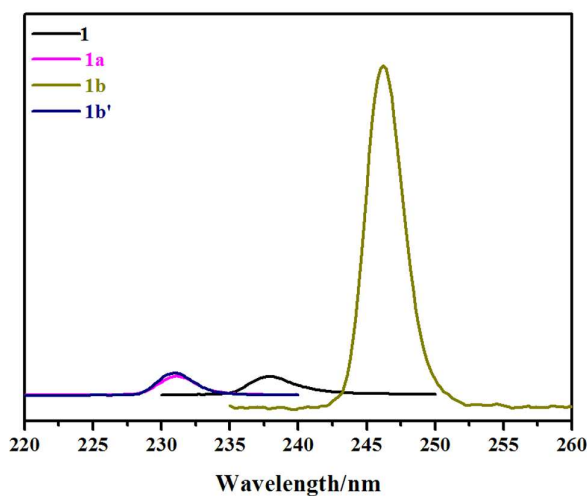

**Figure S8.** Normalized solid-state excitation spectra of **1** (black) and after photoirradiation (**1a**, magenta); after 160 °C heat-treatment in air (**1b**, dark yellow) and after photoirradiation (**1b'**, navy).

## Section 2. The detailed experiment process about photochromism and thermochromism.

Under thermal treatment at any temperature in the range from 54 °C to 60 °C (in thermostatic waterbath) in air or in vacuum for 1 h, the colorless **1** turns to yellow **1a**. **1a** is reversible and stable in air and can return to initial colorless **1** in the dark air for 3 days or in black box at ozone atmosphere for 8 h. **1** (place **1** on the cooling fin) also turns from colorless to yellow **1a** under continuous irradiation using

Hg lamp (300w, 365nm) in air or in vacuum at room temperature within 30 min. The photoinduced yellow **1a** is also stable in air and can undergo reversible transformation to colorless **1** in the dark in air for 3 days.

Continuously heating from 60 °C to 160 °C or directly heating at 160 °C (in thermostatic waterbath), the yellow **1a** also changes to the deep green **1b** in vacuum. Moreover, When **1** directly heated at 160 °C, **1** also turns to deep green sample **1b** in air or **1b'** in vacuum for 1 hour. The deep green sample **1b** and **1b'** can turn to colorless **1** in humid air for 5 days. Moreover, **1b** can turn to **1b'** after thermotreatment between 54 °C and 74 °C or photoirradiation by Hg lamp (300w, 365nm) for 30 min at ambient temperature in dry air.

As a reference, colorless **1** changes into yellow green **1c** (figure S7) by directly heating at 74 °C in air or in vacuum 1 hour. Because the part of lattice water molecules lose, **1** takes place significant phase transition (figure S3, S4).

### Section 3. Crystallographic data tables.

**Table S1.** Selected bond lengths (Å) and angles (°) for **1**.

|                    |            |                    |            |
|--------------------|------------|--------------------|------------|
| Bi(1)-Cl(2)        | 2.5277(18) | Bi(2)-Cl(9)        | 2.5487(17) |
| Bi(1)-Cl(4)        | 2.5541(17) | Bi(2)-Cl(5)        | 2.6170(18) |
| Bi(1)-Cl(3)        | 2.6433(18) | Bi(2)-Cl(6)        | 2.676(2)   |
| Bi(1)-O(6)         | 2.678(5)   | Bi(2)-Cl(8)        | 2.782(2)   |
| Bi(1)-Cl(1)        | 2.7515(18) | Bi(2)-Cl(7)        | 2.788(2)   |
| Bi(1)-Cl(10)       | 2.9135(18) | Bi(2)-Cl(10)       | 2.9593(18) |
| Cl(2)-Bi(1)-Cl(4)  | 90.60(6)   | Cl(9)-Bi(2)-Cl(5)  | 92.83(6)   |
| Cl(2)-Bi(1)-Cl(3)  | 90.22(6)   | Cl(9)-Bi(2)-Cl(6)  | 90.08(7)   |
| Cl(4)-Bi(1)-Cl(3)  | 89.84(6)   | Cl(5)-Bi(2)-Cl(6)  | 88.65(6)   |
| Cl(2)-Bi(1)-O(6)   | 173.60(12) | Cl(9)-Bi(2)-Cl(8)  | 86.46(6)   |
| Cl(4)-Bi(1)-O(6)   | 83.48(12)  | Cl(5)-Bi(2)-Cl(8)  | 89.97(6)   |
| Cl(3)-Bi(1)-O(6)   | 92.20(12)  | Cl(6)-Bi(2)-Cl(8)  | 176.21(7)  |
| Cl(2)-Bi(1)-Cl(1)  | 88.25(6)   | Cl(9)-Bi(2)-Cl(7)  | 89.53(6)   |
| Cl(4)-Bi(1)-Cl(1)  | 93.52(6)   | Cl(5)-Bi(2)-Cl(7)  | 176.42(6)  |
| Cl(3)-Bi(1)-Cl(1)  | 176.31(6)  | Cl(6)-Bi(2)-Cl(7)  | 88.65(6)   |
| O(6)-Bi(1)-Cl(1)   | 89.68(12)  | Cl(8)-Bi(2)-Cl(7)  | 92.87(6)   |
| Cl(2)-Bi(1)-Cl(10) | 90.58(6)   | Cl(9)-Bi(2)-Cl(10) | 177.89(6)  |
| Cl(4)-Bi(1)-Cl(10) | 176.83(6)  | Cl(5)-Bi(2)-Cl(10) | 87.99(6)   |
| Cl(3)-Bi(1)-Cl(10) | 87.21(6)   | Cl(6)-Bi(2)-Cl(10) | 91.89(6)   |
| O(6)-Bi(1)-Cl(10)  | 95.46(11)  | Cl(8)-Bi(2)-Cl(10) | 91.59(6)   |
| Cl(1)-Bi(1)-Cl(10) | 89.45(6)   | Cl(7)-Bi(2)-Cl(10) | 89.76(6)   |

|                    |           |
|--------------------|-----------|
| Bi(1)-Cl(10)-Bi(2) | 178.89(9) |
|--------------------|-----------|

**Table S2.** Hydrogen-bond parameters in compound **1**.

| D-H...A            | d(D-H)( Å) | d(H...A)( Å) | d(D...A)( Å) | <(DHA)( °) |
|--------------------|------------|--------------|--------------|------------|
| N(10)-H(13)...O(3) | 0.86       | 1.98         | 2.776(9)     | 153.7      |
| N(9)-H(26)...O(4)  | 0.86       | 2.07         | 2.811(9)     | 143.2      |
| N(5)-H(6)...O(2)   | 0.86       | 2.06         | 2.832(8)     | 148.6      |
| N(4)-H(7)...O(5)   | 0.86       | 2.09         | 2.829(8)     | 144.0      |
